# 1 **An automatic pipeline for the design of irreversible** 2 **derivatives identifies a potent SARS-CoV-2 M<sup>pro</sup> inhibitor.**

3  
4  
5 Daniel Zaidman<sup>1,\*</sup>, Paul Gehrtz<sup>1,\*</sup>, Mihajlo Filep<sup>1</sup>, Daren Fearon<sup>2</sup>, Jaime Prilusky<sup>3</sup>, Shirly  
6 Duberstein<sup>4</sup>, Galit Cohen<sup>4</sup>, David Owen<sup>2,5</sup>, Efrat Resnick<sup>1</sup>, Claire Strain-Damerell<sup>2,5</sup>, Petra  
7 Lukacik<sup>2,5</sup>, Covid-Moonshot Consortium, Haim Barr<sup>4</sup>, Martin A. Walsh<sup>2,5</sup>, Frank von Delft<sup>2,5,6,7</sup>,  
8 Nir London<sup>1,#</sup>

9  
10 <sup>1</sup> Dept. of Organic Chemistry, Weizmann Institute of Science, 7610001, Rehovot, Israel

11 <sup>2</sup> Diamond Light Source Ltd., Harwell Science and Innovation Campus, Didcot OX11 0QX, U.K.

12 <sup>3</sup> Life Sciences Core Facilities, Weizmann Institute of Science, 7610001, Rehovot, Israel

13 <sup>4</sup> Wohl Institute for Drug Discovery of the Nancy and Stephen Grand Israel National Center for  
14 Personalized Medicine, The Weizmann Institute of Science, Rehovot, 7610001, Israel

15 <sup>5</sup> Research Complex at Harwell, Harwell Science and Innovation Campus, Didcot OX11 0FA,  
16 U.K.

17 <sup>6</sup> Structural Genomics Consortium, University of Oxford, Old Road Campus, Roosevelt Drive,  
18 Headington, OX3 7DQ, UK

19 <sup>7</sup> Department of Biochemistry, University of Johannesburg, Auckland Park 2006, South Africa

20

21

22 \* Equal contribution

23 # Corresponding author: [nir.london@weizmann.ac.il](mailto:nir.london@weizmann.ac.il)

24

25 Keywords: irreversible inhibitors, covalent inhibitors, covalent docking, computer aided drug  
26 discovery, DOCKoalent, COVID-19, SARS-CoV-2

## 27 **Abstract**

28 Designing covalent inhibitors is a task of increasing importance in drug discovery. Efficiently  
29 designing irreversible inhibitors, though, remains challenging. Here, we present *covalentizer*, a  
30 computational pipeline for creating irreversible inhibitors based on complex structures of targets  
31 with known reversible binders. For each ligand, we create a custom-made focused library of  
32 covalent analogs. We use covalent docking, to dock these tailored covalent libraries and to find  
33 those that can bind covalently to a nearby cysteine while keeping some of the main interactions of  
34 the original molecule. We found ~11,000 cysteines in close proximity to a ligand across 8,386  
35 protein-ligand complexes in the PDB. Of these, the protocol identified 1,553 structures with  
36 covalent predictions. In prospective evaluation against a panel of kinases, five out of nine predicted  
37 covalent inhibitors showed IC<sub>50</sub> between 155 nM - 4.2 μM. Application of the protocol to an  
38 existing SARS-CoV-1 M<sup>pro</sup> reversible inhibitor led to a new acrylamide inhibitor series with low  
39 micromolar IC<sub>50</sub> against SARS-CoV-2 M<sup>pro</sup>. The docking prediction was validated by 11 co-crystal  
40 structures. This is a promising lead series for COVID-19 antivirals. Together these examples hint  
41 at the vast number of covalent inhibitors accessible through our protocol.

42

## 43 Introduction

44

45 Covalent irreversible inhibitors have become increasingly popular over the last decade as  
46 chemical probes and drugs. Most often these inhibitors target a cysteine residue to form the  
47 covalent bond. Several rationally-designed irreversible inhibitors targeting cysteines were  
48 approved by the FDA in recent years, with notable examples such as Ibrutinib<sup>1</sup>, Afatinib<sup>2</sup> and  
49 Osimertinib<sup>3</sup>. Irreversible binding offers a variety of advantages, including prolonged residence  
50 time<sup>4</sup> and an ability to compete with high-affinity natural substrates<sup>5-7</sup>. Another important  
51 advantage of covalent inhibitors is their improved selectivity when targeting non-conserved  
52 cysteine residues<sup>8,9</sup>. Moreover, covalent binding can enable targeting of especially challenging  
53 targets such as the G12C oncogenic K-Ras mutation<sup>10-12</sup>.

54 Historically, most covalent inhibitors were designed by the addition of an electrophile to  
55 an already known reversible inhibitor that suitably binds next to a cysteine residue<sup>13-18</sup>. More  
56 recently, covalent inhibitors are also being discovered by empirical screening of covalent fragment  
57 libraries<sup>19-25</sup> and by covalent virtual screening<sup>10,26-32</sup>. While covalent fragment and virtual  
58 screening can potentially discover new scaffolds, the binding affinity of primary hits may be  
59 relatively low, and often require laborious medicinal chemistry to reach suitable potency.

60 Covalent derivatization of an already known reversible binder, can endow the compound  
61 with added benefits of irreversible binding such as time dependent inhibition, longer duration of  
62 action, improved selectivity towards proteins that contain the target cysteine compared to  
63 homologs without a cysteine at that position, and possibly improved potency. Still, this approach  
64 is far from trivial. Three crucial questions have to be answered: 1. Which electrophilic moiety to  
65 use? 2. What is the optimal vector on the scaffold to attach through? 3. What linker, if any, would  
66 optimize the placement of the electrophile with respect to the binding mode of the scaffold and the  
67 position of the target cysteine residue? There are numerous possible answers for these questions.  
68 Furthermore, the “*covalentized*” (derivative containing the electrophile) version of the reversible  
69 inhibitor should be synthetically accessible. Therefore, tools that would enable to address this  
70 design problem algorithmically, would significantly simplify covalent inhibitor design and has the  
71 potential to discover many potent covalent binders for a large variety of targets.

72 Computational approaches to address this challenge are scarce. DUckCov<sup>29</sup> a covalent  
73 virtual screening method, begins with non-covalent docking of a library of covalent compounds,  
74 while using pharmacophoric constraints for hydrogen bonds, as well as for the covalent warhead.  
75 This is followed by covalent docking of the ligands with the strongest non-covalent affinities.  
76 CovaDOTS<sup>33</sup> uses a set of synthetic schemes and available building blocks, to create covalent  
77 analogs of existing non-covalent ligands, but was only assessed retrospectively. Cov\_FB3D<sup>34</sup>  
78 constructs *de novo* covalent ligands and was retrospectively assessed on recapitulation on known  
79 covalent inhibitors.

80 Here we present a computational pipeline to identify potential existing reversible binders  
81 for *covalentization* (creation of a covalent analog). Given a complex structure or model of a ligand  
82 in the vicinity of a cysteine residue, we elaborate the ligand or its substructures with various

83 electrophiles. This *ad hoc* library of covalent analogs is covalently docked to the target protein and  
84 the original (non-covalent) structure is used as a filter to identify high-confidence covalent  
85 candidates. We applied this protocol - *covalentizer* - to the entire PDB to identify thousands of  
86 potential candidates amenable for irreversible inhibition, and made both the protocol and the  
87 database of pre-computed candidates publicly available to the community  
88 (<https://covalentizer.weizmann.ac.il>). We have prospectively synthesized and tested several  
89 predictions of various covalent kinase inhibitors proposed by the protocol and succeeded in five  
90 out of nine designs with IC<sub>50</sub>'s of 155 nM - 4.2 μM.

91 In early February 2020, the COVID-19 pandemic started to spread globally<sup>35,36</sup>. We turned  
92 to the pre-compiled database of *covalentizer* results, to look for possible candidate inhibitors for  
93 SARS-CoV-2 proteins. The search found a reversible small molecule inhibitor designed against  
94 the main protease of the SARS-CoV-1 virus (PDB: 3V3M<sup>37</sup>), which has 96% sequence identity to  
95 the main protease of SARS-CoV-2, with a promising covalent prediction. We synthesized the  
96 prediction and validated irreversible binding to the SARS-CoV-2 main protease (M<sup>Pro</sup>). We further  
97 optimised the non-covalent affinity of the compound, resulting in improved analogs. Co-crystal  
98 structures confirmed the computational model. This example highlights the strength of our method  
99 - the design was already available, and enabled very rapid development. The database suggests  
100 that hundreds more such examples await testing.

101

## 102 Results

103

### 104 *The covalentizer pipeline*

105

106 For a given complex structure with a reversible ligand in the vicinity of a target cysteine  
107 residue, the pipeline (Fig. 1) comprises four consecutive steps: fragmentation, electrophile  
108 diversification, covalent docking and RMSD filtering.

109

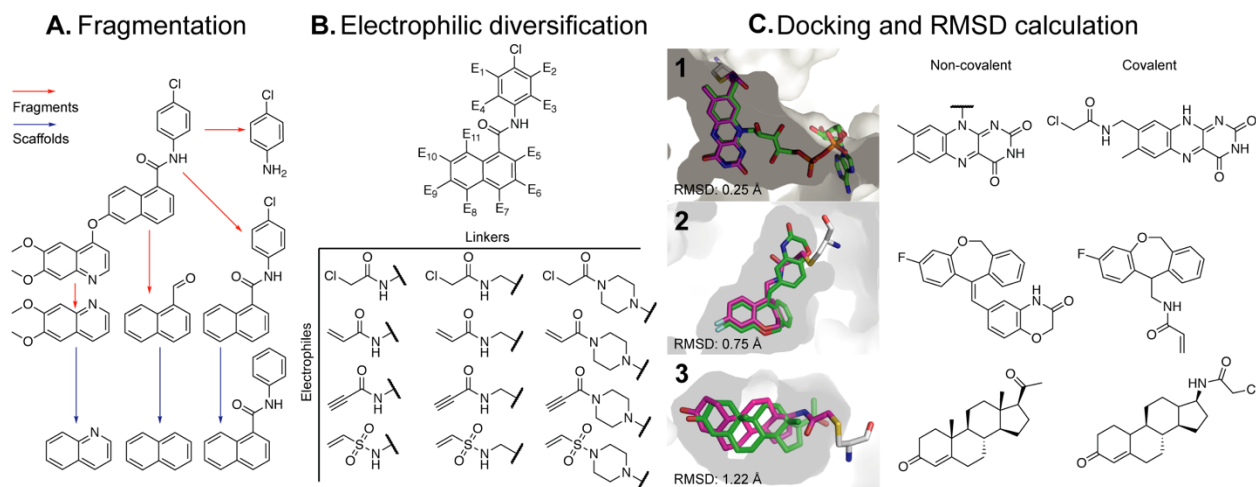

110

### 111 **Figure 1. An overview of the covalentizer computational protocol.**

112 The protocol comprises four consecutive steps. **A. Fragmentation:** the molecule is broken and divided into fragments  
113 (red arrows) using synthetically accessible bonds<sup>38</sup>. Murcko scaffolds<sup>39</sup> of the fragments (blue arrows) are also added  
114 to the list of fragments. **B. Electrophilic diversification:** for each substructure, a library of potential electrophilic  
115 analogs is generated, a few hundred compounds in size. We used four kinds of nitrogen-based electrophiles ranging  
116 in reactivity: vinyl sulfones, chloroacetamides, acrylamides and propynamides. We also considered various linkers  
117 between the fragment and the electrophile. **C. Docking:** The target structure is then docked against its appropriate  
118 analog library using all available cysteine rotamers. Finally, RMSD calculation: For each docked compound, an  
119 RMSD is calculated between the MCS (maximal common substructure) of the reversible compound and the new  
120 covalent analog. We show examples of predictions with increasing RMSDs, for binders of 1. Nitrate reductase from  
121 *Ulva prolifera* (PDB: 5YLY) 2. Human mineralocorticoid receptor (PDB: 5HCV) and 3. Human progesterone receptor  
122 (PDB: 1A28).

123

124 **A. Fragmentation:** In this step, the ligand is broken-down and divided into two parts via  
125 synthetically accessible bonds<sup>38</sup>. Doing this recursively, results in a list of substructures (Fig. 1A).  
126 For each substructure, we augment the list with its corresponding Murcko scaffold<sup>39</sup> (the naked  
127 ring system, without any decoration) to allow more exit vectors from which the electrophile can  
128 be added next. The motivation for this fragmentation step is three-fold. First, as mentioned,  
129 fragmenting the molecule exposes new vectors on which to install the electrophile (see Fig. 1C  
130 example 2). Second, the additional constraint of forming the covalent bond might cause a slight  
131 shift to the molecule's binding mode from the original crystal structure. Such a shift may propagate  
132 and cause a steric clash between the protein and a ligand moiety distal to the electrophile. Since  
133 adding the covalent bond is expected to increase the overall potency, we 'sacrifice' parts of the

134 molecule to enable the addition of an electrophile. The final ranking of candidate covalent analogs  
135 relies on covalent docking which is sensitive to sub-Å shifts. Hence, occasionally, a truncated  
136 version of the ligand will dock well, while the full ligand will not. Thus, including the sub-  
137 structures and their scaffolds maximizes the number of candidates. Since covalent docking  
138 accuracy was shown to deteriorate with ligand size and number of rotatable bonds<sup>26</sup>, we filter the  
139 final list of substructures, to those with 8-25 heavy atoms and up to five rotatable bonds.

140  
141 **B. Electrophile diversification:** For each substructure or scaffold, we generate a library of potential  
142 electrophilic analogs, typically resulting in a few hundred analogs (Fig. 1B). We consider four  
143 kinds of electrophiles ranging in reactivity: vinyl sulfonamides, chloroacetamides, acrylamides  
144 and propynamides, that can all be installed in one step onto a free amine. We add these  
145 electrophiles to the substructures using simple connection rules which, however, do not guarantee  
146 synthetic accessibility (see methods section for more details). We also consider various linkers  
147 between the fragment and the electrophile. In our application below, we considered either a  
148 methylene linker or various di-amine linkers (Supp. Fig. 1).

149  
150 **C. Covalent docking:** The structure of the complex is prepared for docking, using all available  
151 cysteine rotamers. We use DOCKoValent<sup>26</sup> to dock the electrophile library we described above  
152 against the protein (after removing the crystallographic ligand).

153  
154 **D. RMSD filtering:** Compounds that are able to form a covalent bond with the target cysteine while  
155 still maintaining the same binding mode of the original reversible ligand are likely candidates for  
156 covalent analogs. To assess this, we evaluate the RMSD (root mean square deviation) between  
157 each docking prediction and the crystallographic ligand. Due to the fact that RMSD is calculated  
158 between two sets of matching atoms, and the reversible ligand is different from the irreversible  
159 one, it was calculated based on the maximal common substructure (MCS) between the two  
160 molecules. Figure 1C exemplifies predictions with varying RMSDs. For a PDB wide application  
161 of the pipeline, we focused on covalent analogs with a docking position of < 1.5 Å RMSD from  
162 the crystallographic ligand.

163  
164 *Covalent kinase inhibitors benchmark*

165  
166 To benchmark the pipeline, we wanted to test whether it is able to find known covalent inhibitors,  
167 given only their reversible part as input. To achieve this, we used the kinase subset of a recently  
168 published covalent docking benchmark<sup>30</sup>. This set included 35 kinase covalent inhibitor complex  
169 structures with either acrylamides, chloroacetamides or vinyl sulfonamides (after excluding seven  
170 inhibitors with uncommon electrophiles). To form the input for *covalentizer*, we removed the  
171 electrophiles while leaving only a free amine. For substituted acrylamides we removed β-  
172 substitutions as well.

173 Out of the 35 structures, the pipeline identified the crystallographic covalent inhibitor in  
174 14 (40%) of the cases, with a threshold of 1.5 Å MCS-RMSD (Fig. 2; Supp. Table 1).  
175

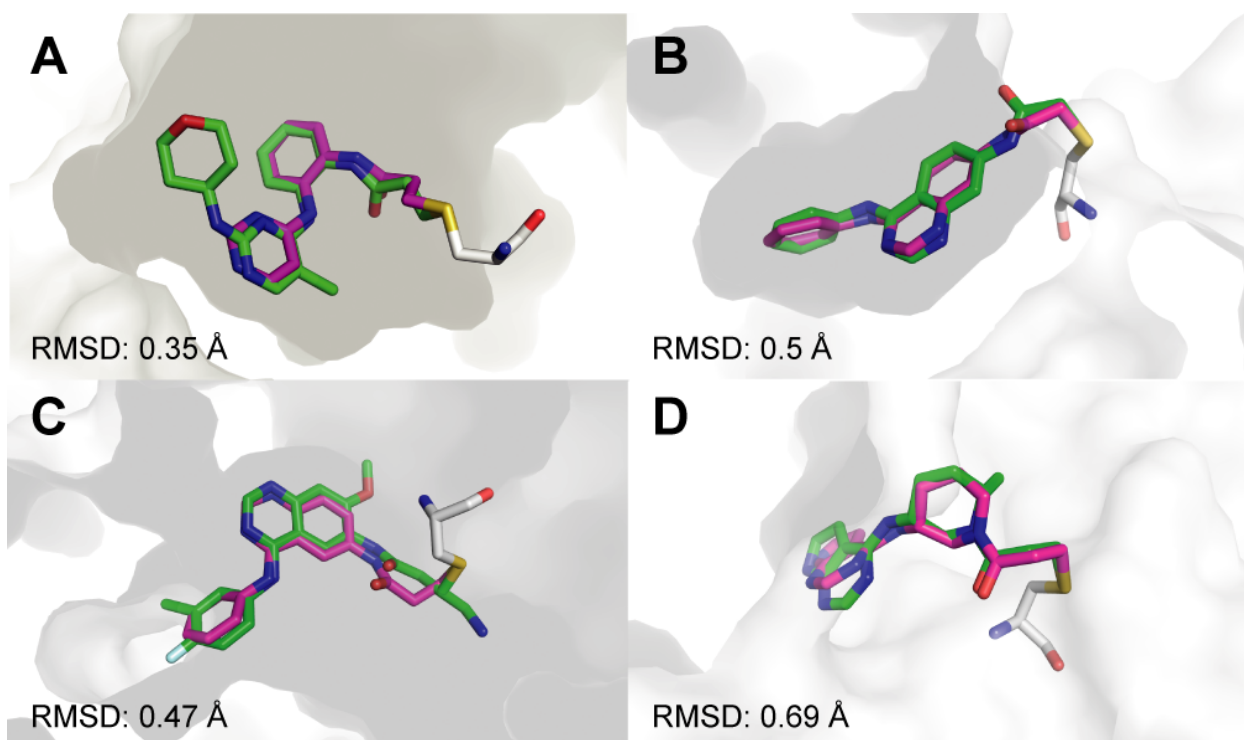

176  
177 **Figure 2. *Covalentizer* successfully recapitulates known covalent kinase inhibitors.**  
178 Examples of covalent kinase inhibitors (green) for which *covalentizer* was able to find a substructure match (magenta)  
179 under the 1.5 Å threshold. **A.** ERK2, PDB: 4ZZO. **B.** EphB3, PDB: 5L6P. **C.** EGFR (T790M), PDB: 4I24. **D.** JAK3,  
180 PDB: 5TOZ. The electrophiles span acrylamides (A,D), a substituted acrylamide (C) and chloroacetamide (B).  
181

### 182 *Covalentizing the PDB*

183  
184 Encouraged by the results in recapitulating known covalent kinase inhibitors we aimed to  
185 apply our protocol to the entire PDB. We started from the set of all the protein-small molecule X-  
186 ray structures (< 3.0 Å resolution) that contained a small molecule with a molecular weight greater  
187 than 300 Da, and no DNA/RNA chains. As of the date of the search (July 4th, 2019) this resulted  
188 in 44,990 structures. We filtered these to structures in which a ligand has one of its atoms within  
189 6 Å of the sulphur atom of a free cysteine residue. Disulfides or covalently modified cysteines  
190 were excluded. After applying this filter, we ended up with 8,386 such structures, and ~11,000  
191 cysteines.

192 These structures, which constitute the target space for our protocol, contain significant  
193 redundancy. Clustering them with a threshold of 90% sequence identity, results in 2,227  
194 representatives. 38% of the structures are of human proteins and the rest span many other  
195 organisms including rodents, bacteria and yeast. They also span seven different enzyme classes,  
196 with the most prevalent being transferases (41.4%). 928 structures (11.1% of the entire dataset)

197 are kinases. These ~8,400 proteins contain 3,673 different ligands, each binding next to a cysteine.  
198 The ligand that is most abundant in this database is Flavin-Adenine Dinucleotide occurring in 504  
199 structures, whereas 3,058 ligands (83% of the compounds) occur only in a single structure. The  
200 most common ligands were nucleotide or nucleotide-like molecules.

201 After running the aforementioned algorithm against the ~8,400 structures that passed our  
202 filtering (Fig 3A), 1,553 structures produced at least one candidate below the 1.5 Å RMSD cutoff.  
203 These structures represent roughly 380 proteins (representative set at 95% sequence identity).  
204 1,051 structures are of human proteins, 338 are structures of kinases. 80 of the structures had  
205 produced a covalent analog prediction that was docked < 0.5 Å from the original ligand,  
206 representing very high-confidence candidates (Fig. 3B). The distribution of selected electrophiles  
207 is almost uniform (Fig. 3C). All of the predictions are made available through a public website  
208 (<https://covalentizer.weizmann.ac.il>) which is automatically updated weekly with new PDB  
209 entries.

210

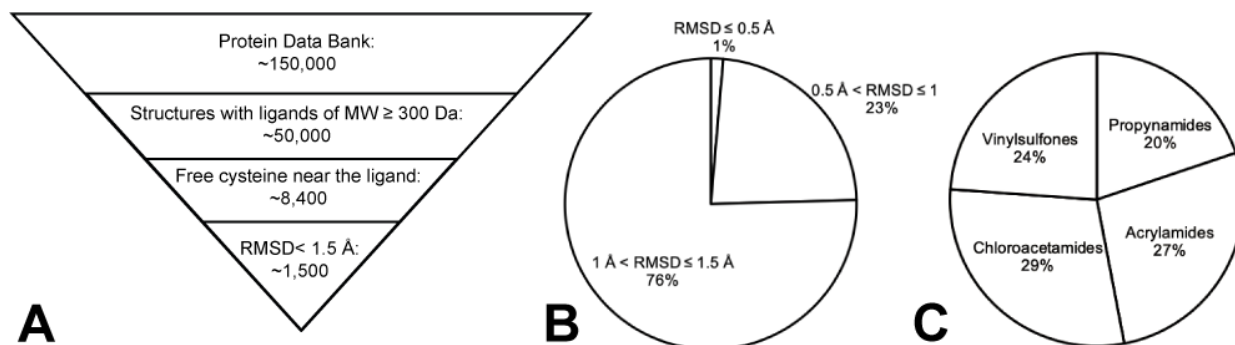

211  
212 **Figure 3. PDB wide application of *covalentizer* identifies candidate irreversible inhibitors for more than 1,500**  
213 **structures.** **A.** We filtered the protein data bank (PDB) for structures that had only protein chains (no DNA/RNA),  
214 and contained a small molecule of at least 300 Da. This threshold was set to ensure some minimal initial fit/binding  
215 affinity to the target, as well as to filter out non-ligand small molecules like crystallization reagents. We used a pymol  
216 based script to filter only the structures in which at least one ligand atom is < 6 Å away from the sulfur atom of a  
217 cysteine residue. This cysteine also has to be free (no disulfide or other covalent modifications). After running the  
218 *covalentizer* protocol and filtering only for results with < 1.5 Å RMSD of the maximal common substructure (MCS)  
219 between the reversible ligand and the covalent analog generated by *covalentizer*, there were 1,553 structures for which  
220 at least one such prediction was obtained. **B.** The top 1% of results have an RMSD under 0.5 Å. 23% are between 0.5  
221 Å and 1 Å, and 76% are between 1 Å and 1.5 Å. **C.** The distribution of the four electrophiles used is balanced, with  
222 29% chloroacetamides, 27% acrylamides, 24% vinylsulfones, and 20% propynamides.

223

### 224 *Exploring additional linkers*

225

226 As mentioned above, the entire database was processed using direct attachments of the  
227 electrophiles to atoms of the sub-structures, as well as with a methylene linker. The use of longer  
228 and more diverse linkers for the addition of an electrophile would allow the targeting of cysteines  
229 further from the ligand thus increasing the available target space, as well as diversifying the  
230 introduced chemistry. To investigate this further, we searched the covalent inhibitor discovery  
231 literature<sup>40-43</sup> for the most common di-amine linkers used in the last decade which led to the



232 selection of 7 aromatic linkers and 17 aliphatic linkers (Supp. Fig. 1). Since including all of these  
233 linkers increases the computational demands of the pipeline, we restricted its application to the  
234 subset of liganded kinase structures in the PDB. Since these linkers can enable ligands to reach  
235 further cysteines at extended distances, the search criteria was extended to a distance of up to 10  
236 Å from the ligand (instead of 6 Å, previously).

237 The final subset includes 1,880 PDB structures that contain a Cys residue of up to 10 Å  
238 away from one of 1,398 various ligands. The size of the custom-made libraries of electrophilic  
239 analogs for a particular reversible ligand, containing these linkers, now extends to a few thousand  
240 compounds. Overall, we generated *in silico* over 3 million electrophilic compounds with di-amine  
241 linkers for the kinase subset. The results show candidates of < 1.5 Å MCS-RMSD between the  
242 original reversible ligand and the electrophilic candidate for 411 protein structures. 186 of these  
243 structures (45%) were not found in the previous run, showing the potential of using these more  
244 sophisticated linkers to reach farther cysteines and to *covalentize* more ligands.

245

246 *Novel covalent inhibitors for various kinases*

247

248 Kinase inhibitors comprise 22% of the *covalentizer* results. We selected a subset of these  
249 for prospective validation. We chose the candidates based on three features: 1. Low RMSD relative  
250 to the parent reversible ligand. 2. The addition of the electrophile is not predicted to interfere with  
251 the kinase hinge binding region. 3. Ease of synthesis. This required manual inspection of pre-  
252 selected low RMSD results. Overall, we made and tested nine compounds (Fig. 4) targeting five  
253 different kinases. In some cases, addition of the electrophile required removal of large parts of the  
254 parent reversible ligand (Supp. Fig. 2). The compounds were each tested in a kinase activity assay  
255 against the target kinase in the structure from which the *covalentizer* result was derived. The assay  
256 was performed at ATP concentration equal to the  $K_m$  of the kinase in question, with a 2 h pre-  
257 incubation of the inhibitor at 25 °C.

258

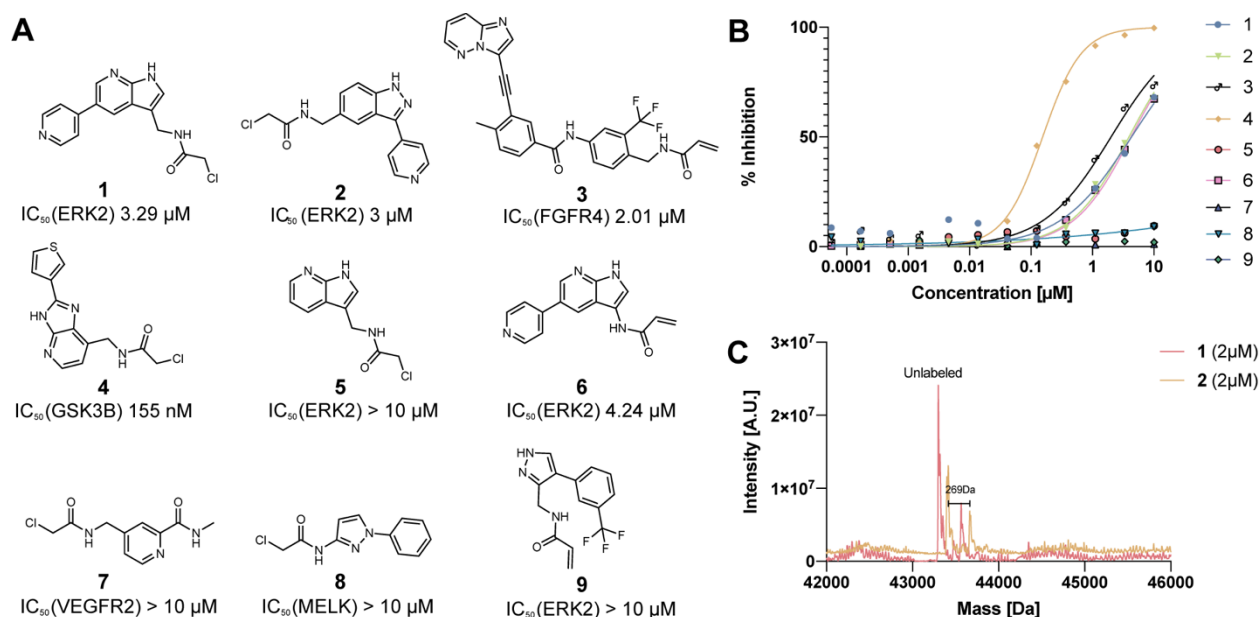

259  
 260 **Figure 4. Prospective prediction identifies novel irreversible kinase inhibitors.** **A.** Chemical structures and in vitro  
 261 kinase activity assay  $IC_{50}$ s for nine prospective *covalentizer* predictions. See Supp. Fig. 2 for the parent compounds,  
 262 pose predictions and RMSD values. **B.** Dose response curves for each of the nine compounds (see additional  
 263 repetitions for **1** and **2** in Supp. Fig. 3). Each compound was tested against its corresponding target kinase. **C.**  
 264 Deconvoluted mass spectra obtained by intact protein LC/MS of recombinant ERK2 (2  $\mu\text{M}$ ) incubated with equimolar  
 265 **1** or **2** for 1 h at room temperature, identifies significant irreversible binding by both compounds.  
 266

267 Four of the nine compounds did not show inhibition under the assay conditions ( $IC_{50}$  > 10  
 268  $\mu\text{M}$ ). Three compounds targeting ERK2 showed  $IC_{50}$  values of 3 - 4.24  $\mu\text{M}$ . For two of these  
 269 inhibitors, **1** and **2**, we assessed irreversible binding to ERK2 by intact protein mass spectrometry  
 270 (2  $\mu\text{M}$  ERK2, 2  $\mu\text{M}$  compound, 1 h incubation at 25  $^{\circ}\text{C}$ ). The expected protein-compound adducts  
 271 were detected (25% and 33% labeling respectively; peak-to-peak  $\Delta m$  265-270 Da for both  
 272 compounds; Fig. 4B) with no additional adducts derived from multiple reactions, highlighting the  
 273 moderate reactivity of the designed  $\alpha$ -chloroacetamides. The remaining *covalentizer* hits included  
 274 a 2.01  $\mu\text{M}$  inhibitor (**3**) of FGFR4 derived from the non-selective kinase inhibitor ponatinib, and a  
 275 155 nM inhibitor (**4**) of GSK3 $\beta$ .  
 276

#### 277 *A covalent SARS-CoV-2 main protease inhibitor*

278  
 279 Upon the release of the first structure of the new SARS-CoV-2 M<sup>pro</sup> protease (PDB:  
 280 6LU7<sup>44</sup>) we noticed that the active site is nearly identical to that of SARS-CoV-1. The entire  
 281 protein is highly conserved with 96% sequence identity. This prompted us to search the database  
 282 for covalent versions of SARS-CoV-1 M<sup>pro</sup> ligands. One such prediction was available based on a  
 283 reversible inhibitor ML188 ( $IC_{50}$  = 4.8  $\pm$  0.8  $\mu\text{M}$ , racemate; 1.5  $\pm$  0.3  $\mu\text{M}$ , (*R*)-enantiomer) of the  
 284 SARS-CoV-1 main protease (PDB: 3V3M<sup>37</sup>; Fig. 5A). We re-synthesized and tested racemic  
 285 ML188 against SARS-CoV-2 M<sup>pro</sup> which showed an  $IC_{50}$  of 3.14  $\mu\text{M}$  (Supp. Fig. 4A), similar to  
 286 what has been reported for SARS-CoV-1. ML188 was synthesized using the Ugi four-component

287 reaction (4-CR), and the covalent prediction was easily accessible by replacing one reactant (2-  
288 furoic acid to acrylic acid) to give **10**, synthesized and isolated as the racemate (Fig. 5D). We  
289 initially assessed irreversible binding of **10** towards recombinant SARS-CoV-2 M<sup>pro</sup> using intact  
290 protein mass spectrometry (2  $\mu$ M protein, 1.5 h incubation with electrophile at 25 °C; Fig. 5F).  
291 The expected adduct was detected with 19% labeling at 2  $\mu$ M compound, and up to 88% labeling  
292 at 200  $\mu$ M compound (Fig. 5F).

293 Despite the irreversible binding, this initial compound did not show strong inhibition in a  
294 fluorescence-based enzymatic assay ( $IC_{50} > 99 \mu$ M, 13% inhibition at 20  $\mu$ M; 15 min pre-  
295 incubation; Fig. 5H). However, it was a promising starting point for additional optimization. Due  
296 to the modular nature of the Ugi 4-CR procedure, it was possible to synthesize and test large  
297 libraries of analogs by systematically varying each reactant to target different pockets. We  
298 designed those libraries based on computational modelling of *in silico* generated Ugi products, as  
299 well as an exhaustive screen of commercially available isocyanides (see Supp. Dataset 1). A few  
300 of the early combinatorial synthetic results, which had low biochemical potency (comparable to  
301 our starting Ugi compound), allowed for crystallographic analysis in the presence of M<sup>pro</sup>. In these  
302 cases, the expected binding mode was recapitulated experimentally and showed low deviation  
303 from the non-covalent starting point (Fig. 5B, 5C, Supp. Fig. 5), thus proving the *covalentizer*  
304 prediction to be correct. In all crystal structures, the electrophile formed the expected covalent  
305 bond with the catalytic cysteine residue.

306 To optimize **10**, we have made and tested close to 140 analogs (Supp. Dataset 1; Fig. 5.  
307 Supp. Fig. 7,8), exploring all three components of the Ugi reaction while keeping the acrylamide  
308 fixed. We explored a variety of replacements for the initial *p-tert*-butylphenyl motif protruding  
309 into the S2 pocket (Fig. 5), most of them did not result in improved potency (Supp. Fig. 7C).  
310 Similarly, independent optimization of binding to the S1 pocket only led to the identification of  
311 one beneficial change (**23**,  $IC_{50} 65.58 \mu$ M), with a *meta* chloro-substitution of the pyridine (Supp.  
312 Fig. 7A). Other substituents (-Br, -OMe, -OEt, -CF<sub>2</sub>CH<sub>3</sub>) led to inactive compounds.

313 Beyond further optimization of the S1 and S2 pocket binding it was clear that extension of  
314 the ligand towards the S3 and S4 pockets should prove fruitful. For example, a reversible-covalent  
315  $\alpha$ -ketoamide inhibitor<sup>46</sup> (biochemical  $IC_{50} 0.67 \mu$ M  $\pm$  0.18  $\mu$ M) probes the S3/4 region with an  
316 additional hydrogen bond to the backbone of Glu166. In a large scale fragment screen, numerous  
317 fragments were able to bind in these pockets<sup>47</sup>. In this case, we exhaustively synthesized analogs  
318 of **10**, using 34 available isocyanides. Starting from **10**, simple alkyl chain extension resulted in  
319 compounds with improved potency (Fig. 5D). In particular compound **11**, harboring a  
320 phenethylamide motif, was particularly potent with an  $IC_{50}$  of 2.95  $\mu$ M (Fig. 5G) and  $K_{inact}/K_i$  of  
321 18.4 M<sup>-1</sup>s<sup>-1</sup> (Supp. Fig. 6).

322

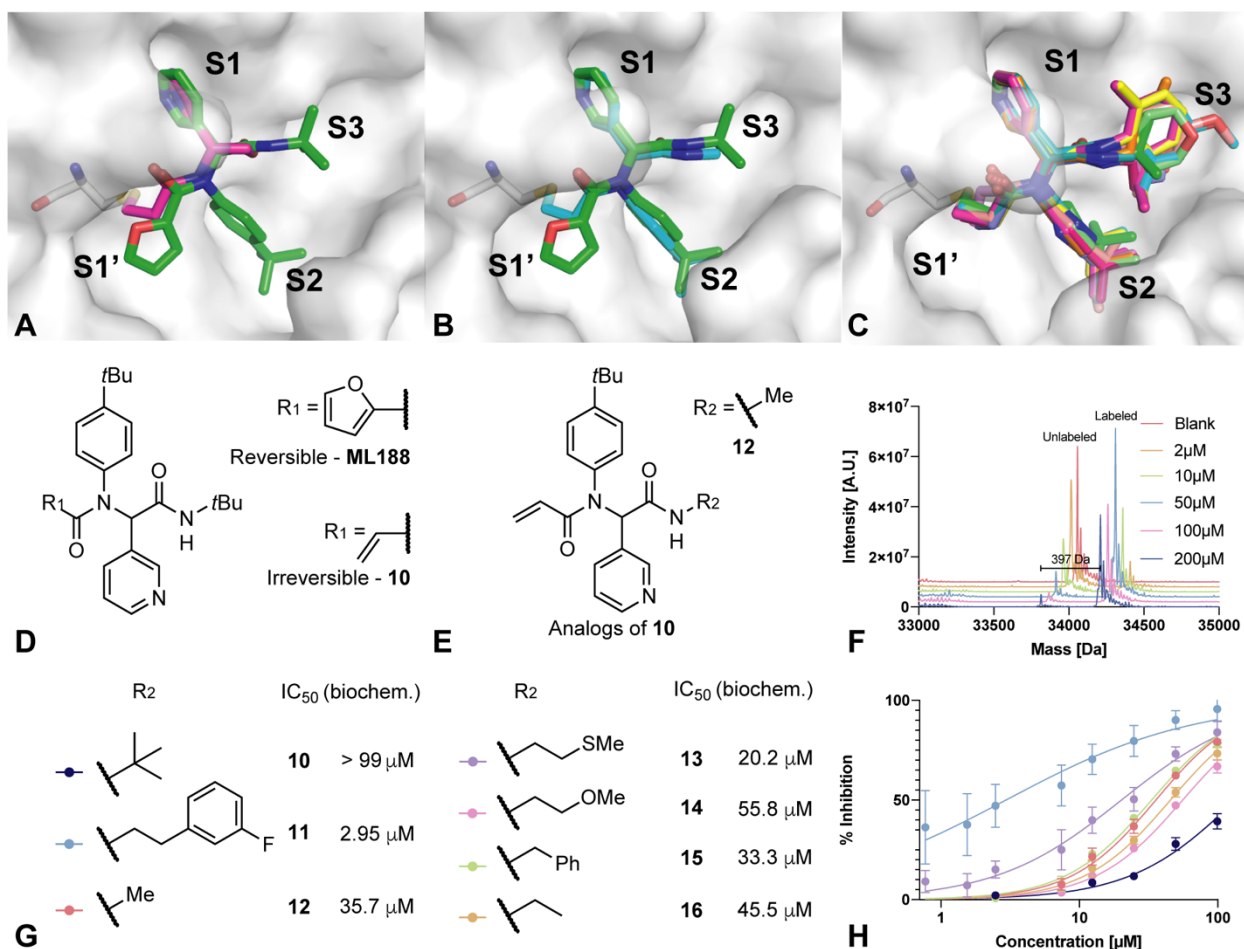

**Figure 5. Computational prediction and experimental validation of an irreversible SARS-CoV-2 M<sup>pro</sup> inhibitor.**

**A.** The *covalentizer* prediction of **10** (magenta) overlaid on the non-covalent compound it is based on (ML188<sup>45</sup>; green; PDB:3V3M). The protocol suggested to substitute the furanyl moiety of ML188 with an acrylamide to bind the catalytic cysteine. The RMSD between the covalent fragment and the original reversible inhibitor is 0.65 Å. **B.** The crystal structure of one of the covalent analogs of **10** (PDB: 5RH5; cyan) overlaid on ML188 (green). **C.** Overlay of all the 11 crystal structures of compound **10** analogs, all exhibiting the same predicted binding mode. PDBs: 5RGT, 5RH5, 5RH6, 5RH7, 5RH9, 5RL0, 5RL1, 5RL2, 5RL3, 5RL4, 5RL5. For individual structures see Supp. Fig. 5. **D.** The chemical structures of ML188 and **10**. **E.** Chemical structure of Ugi compounds exploring the S3 pocket, with the R group that is shown in the crystal structure in (B). **F.** Deconvoluted mass spectra obtained by intact protein LC/MS of recombinant SARS-CoV-2 M<sup>pro</sup> 2 μM incubated with 2 μM - 200 μM **10** for 1.5 h at room temperature. **G.** Further analogs of **10** with their associated biochemical potencies. **H.** The dose response curves for the seven compounds shown in G.

It appears that relief of steric strain around the amide nitrogen also plays a part, since change to a methyl amide (in **12**, relative to **10**) also resulted in increased potency. Opposed to our initial assumption of independent optimization of S1-3 pocket binding, the combination of beneficial structural motifs in a third generation of Ugi products led to inhibitors with diminished potency compared to **11** (see Supp. Fig. 7B; Supp. Dataset 1). One explanation for this behaviour is the high plasticity of M<sup>pro</sup>, leading to induced fit effects.

343 Removal of the furanyl in ML188 and replacement with an electrophile in **10** initially led  
344 to a loss in potency, which in this case was overcome by optimization of the non-covalent affinity  
345 in the S3 region to give compound **11**. Re-installing the furanyl ring in combination with the S3-  
346 optimized phenethylamide motif led to compound **17** with a similar IC<sub>50</sub> (2.72. μM; Supp. Fig.  
347 4B), suggesting that the marked improvement of this side-chain is particular to the covalently  
348 bound conformation.

349 In conclusion, we successfully executed a mode of action change towards irreversible  
350 targeting of the catalytic cysteine residue in M<sup>pro</sup> which may have improved activity in cells as  
351 well as long-term strategic benefits to safeguard against viral evolution.

352

## 353 Discussion

354

355 Designing new covalent inhibitors is challenging. Here we leveraged the subset of protein  
356 targets for which a structure of a known binder is available, to computationally enumerate and  
357 evaluate exhaustive sets of covalent derivatives. Automating the protocol allowed us to apply it to  
358 the entire PDB and assess the applicability of this approach. Prospective testing against six real-  
359 world targets demonstrated that irreversible ligands can be reached with little synthesis, and  
360 structures validated the binding-pose prediction.

361

362 A main advantage of our work is the wide exploration of X-ray structures which produced  
363 an extensive list of candidates waiting to be explored. This allowed us to quickly find a promising  
364 lead series against SARS-CoV-2 M<sup>pro</sup>. This prediction, which was based on a historic non-covalent  
365 SARS-CoV-1 M<sup>pro</sup> inhibitor<sup>45</sup> was pre-calculated, and ready for synthesis at a moment's notice.  
366 We have made thousands of such predictions available through a public website  
367 (<https://covalentizer.weizmann.ac.il>) which updates weekly with the release of new structures to  
368 the PDB. It also allows *covalentizing* of user uploaded structures. We believe this would enable  
369 wide application and experimental testing of new covalent inhibitors.

370

371 Despite the success of our protocol, several caveats remain. First is the fact that currently  
372 the protocol does not take into account the synthetic feasibility of the proposed designs. When  
373 selecting candidates for prospective evaluation, we found that some of the molecules required  
374 complicated synthesis. Incorporating into our pipeline a strategy such as DOTS<sup>33,48</sup>, other  
375 retrosynthesis algorithms<sup>49-51</sup> or even the use of synthetic feasibility scores<sup>52-54</sup>, can significantly  
376 improve the quality of proposed candidates in the future.

377

378 Another point for improvement is the relatively weak potency of our prospective designs  
379 in comparison to their parent compounds. One likely explanation for these lower affinities is the  
380 removal of non-covalent affinity elements which are not sufficiently compensated by the gains  
381 from covalent bond formation. For example, in compound **2** (derived from PDB: 4QTA) more  
382 than 350 Da of the original compound<sup>55</sup> is removed (Supp. Fig. 2), resulting in three orders of  
383 magnitude loss in potency. However the remaining covalent fragment still shows significant  
384 inhibition of ERK2. Another example is compound **1**, its parent compound (PDB: 4QP9) has an  
385 IC<sub>50</sub> of 71 nM, however the propyl-pyrazole group we have omitted in order to accommodate the  
386 electrophile (Supp. Fig. 2) improved the parent reversible binder by more than 150-fold. Lastly  
387 the loss of a hydrogen bond between the M<sup>pro</sup> backbone NH of Gly143 and the furanyl oxygen of  
388 ML188 (PDB: 3V3M), decreased potency, under our assay conditions of 15 min. pre-incubation,  
389 by more than 30-fold. These results suggest that a careful examination of the binding energy  
390 contribution is required for the parts that are omitted in order to accommodate the new electrophile.

391

392           However, as we saw for both ERK2 (**1** vs. **5**) and M<sup>pro</sup> (**10** vs. **11**), improving reversible  
393 recognition is able to improve potency, and even to surpass the parent compound in the case of **11**.  
394 For this series we believe that further structure-based optimization of binding to the S3 pocket,  
395 including H-bonding to Glu166 and chiral separation of the active enantiomer can pave the way  
396 for sub-micromolar Ugi-type covalent M<sup>pro</sup> inhibitors. Thus, in many cases where irreversible  
397 binding is needed our protocol can provide a promising starting point for optimization.

398  
399           Another possible explanation for the relatively low affinity of the irreversible binders are  
400 slight inaccuracies in the covalent warhead positioning which results in sub-optimal covalent bond  
401 formation. Perhaps due to the fact that the docking program does not take into account the actual  
402 formation of the covalent bond, and ignores for instance the transition state energy of the rate-  
403 determining step of the organosulfide bond formation, but rather evaluates the binding energy of  
404 the adduct. Better understanding of the steric and electronic constraints of the covalent bond  
405 formation, and hence a better docking software should improve the results.

406  
407           The docking software also ignores the intrinsic reactivity of the proposed designs. It is  
408 interesting to note in this regard the similar activity of a methylene-chloroacetamide (**1**), compared  
409 to its acrylamide analog (**6**). Such electrophile replacements can be very useful in rational design  
410 of irreversible inhibitors, especially if they prove to work across various scaffolds. Geometrically,  
411 the additional methylene before the chloroacetamide makes the distance from the ring to the thiol  
412 similar to that of the acrylamide (Supp. Fig. 2). In terms of reactivity, however, the acrylamide,  
413 conjugated to the azaindole is activated<sup>56</sup> and thus is likely closer in reactivity to the  
414 chloroacetamide. Indeed, a methylene linker would be the minimal linker element required to  
415 insulate against  $\pi$ -conjugation, allowing easier prediction of intrinsic reactivity. No-linker designs  
416 connected to extended  $\pi$ -systems such as heteroarenes often exhibit a range of intrinsic  
417 reactivities<sup>20,56</sup> which remain challenging to predict computationally<sup>57-59</sup> and thus require careful  
418 evaluation.

419  
420           Many additional designs remain to be discovered beyond the more than 1,500 we made  
421 available through the *covalentizer* server. New electrophiles and linkers which will enable new  
422 geometric trajectories between the cysteine and the molecule, can considerably expand the design  
423 space. We tested this idea computationally using a library of linkers curated from the literature  
424 (Supp. Fig 1), on a subset of kinases from our database, showing an increase in the number of  
425 structures that can be *covalentized*. New covalent ‘warheads’, including reversible covalent  
426 warheads, such as cyanoacrylamides<sup>60</sup>, and chloroacetamides<sup>61</sup> become available, both for  
427 cysteine residues<sup>62</sup>, but also for other amino acids<sup>63-65</sup>. These can be incorporated with little effort  
428 into the *covalentizer* pipeline. Since cysteine is one of the least abundant natural amino acids,  
429 additional covalent chemistries will significantly expand the number of ligands that can be  
430 potentially addressed.

431

432           In summary, we show that using covalent docking we were able to make irreversible  
433 analogs of ligands for which a complex structure is available. We made our discoveries public in  
434 the form of a database of the results we obtained by running our protocol on the entire PDB which  
435 is automatically updated weekly with newly released entries, as well as a web-tool for applying  
436 the protocol on new targets given by users. Using the protocol, we discovered new covalent kinase  
437 inhibitors and optimised a potent covalent COVID-19 protease inhibitor, with a low-cost, modular  
438 and fast synthesis. We hope our results will encourage researchers to apply covalent inhibitors for  
439 a wide range of targets.  
440



## 441 **Methods**

442

### 443 *Programs and libraries*

444 RDKit was used for 2D molecular handling, conformation generation and RMSD  
445 calculation. RDKit: Open-source cheminformatics; [RDKit.org](https://rdkit.org). Marvin was used in the process of  
446 preparing the molecules for docking, Marvin 17.21.0, ChemAxon (<https://www.chemaxon.com>).  
447 DOCKoValent<sup>26</sup> was used for virtual covalent docking.

448

### 449 *Curating target structures from the PDB*

450 Using pymol scripts (The PyMOL Molecular Graphics System, Version 2.0.4 Schrödinger,  
451 LLC), we filtered only the structures that have a ligand in which one of its atoms is within 6 Å  
452 cysteine residue. We further filtered the list to include only cysteines with a free thiol group  
453 (defined as a sulfur atom that is only connected to the residue's Cβ). By doing this, we discarded  
454 any disulfides, as well as cysteines that are already covalently attached to a ligand. We further  
455 removed any ligands which had more than one copy per chain in the structure, and ligands on  
456 which processing of the ligand's SMILES failed.

457

### 458 *Enumerating substructures for covalentization*

459 Fragmentation and scaffold extraction was done using RDKit's implementation of the  
460 Recap algorithm<sup>38</sup> and the MurckoScaffold<sup>39</sup> functionality respectively.

461

### 462 *Covalentizing a substructure*

463 For each substructure or scaffold, we generated a library of potential electrophilic analogs  
464 using SMARTS based reactions. The reaction rules were: 1. Adding an electrophile (including the  
465 nitrogen) to any non-substituted aromatic carbon, as well as all aliphatic carbons with one or two  
466 bonded atoms, excluding carbons which are already connected to nitrogen. 2. Adding an  
467 electrophile to a free amine, either primary or secondary. In this case the nitrogen is completed  
468 with the rest of the electrophile. The first rule will usually require more complicated synthesis,  
469 whereas the second rule, will allow to use the same ligand as a starting material for a nucleophilic  
470 substitution of the acyl form of the electrophile with the free amine.

471

### 472 *Docking and RMSD calculation*

473 RDKit and Marvin were used to create 250 conformations for each electrophilic analog.  
474 Covalent docking was done using DOCKoValent – a virtual screening program. We docked the  
475 appropriate analog library for each target, while saving 10 structures for each analog to increase  
476 the number of final candidates. When docking the larger linker based libraries we only used the  
477 top scoring structure for each analog, due to the large number of structures for analysis. Alternative  
478 rotamers for the cysteine residue were generated with pymol based scripts. We used RDKit to filter  
479 only for results with a MCS that has an RMSD of less than 1.5 Å to the original ligand.

480

481 *Computational optimisation of the M<sup>pro</sup> inhibitor*

482 We used the RDKit reaction functionalities, as well as OpenBabel  
483 ([http://openbabel.org/wiki/Main\\_Page](http://openbabel.org/wiki/Main_Page)) to prepare virtual libraries of analogs of compound **10**. The  
484 Ugi reaction has three reactants: amine, isocyanide, aldehyde and carboxylic acid. The carboxylic  
485 acid is set constant to acrylic acid, since we didn't want to change the electrophilic component. In  
486 the virtual libraries, we left it as the reversible furan moiety for convenience in modeling. We thus  
487 created three such libraries, each one by replacing one of the three other Ugi reactants with  
488 commercially available building blocks. Using RDKit, we generated up to 100 constrained  
489 conformations of each molecule, by fixing the conformation of three components as in the crystal  
490 structure, and changing only the conformation of the variable part. We then used the Rosetta  
491 modeling suite in order to choose the best conformation for each compound, when bound to the  
492 protease. For each molecule, we then defined this set of constrained conformations as an extra  
493 residue for Rosetta, and used Rosetta Packer<sup>66</sup> to choose the best conformation, while allowing  
494 side-chain flexibility. Eventually, we chose analogs only for the amine and the isocyanide  
495 components, as the aldehyde component was highly optimised already. We chose 9 isocyanide  
496 replacements and 14 amine replacements (one of them was not based on docking). Most  
497 combinations of these components were made by Enamine and tested as part of the Covid-  
498 Moonshot effort<sup>47,67</sup>.

499

500 *Intact protein LC/MS*

501 M<sup>pro</sup> was incubated for 90 minutes in 50 mM Tris pH 8 300 mM NaCl in room temperature.  
502 ERK2 was incubated for 60 minutes in 10 mM Hepes pH 7.5 500 mM NaCl and 5% glycerol in  
503 room temperature. The LC/MS runs were performed on a Waters ACUITY UPLC class H  
504 instrument, in positive ion mode using electrospray ionization. UPLC separation used a C4 column  
505 (300 Å, 1.7 µm, 21 mm × 100 mm). The column was held at 40 °C and the autosampler at 10 °C.  
506 Mobile solution A was 0.1% formic acid in water, and mobile phase B was 0.1% formic acid in  
507 acetonitrile. The run flow was 0.4 mL/min with gradient 20% B for 4 min, increasing linearly to  
508 60% B for 2 min, holding at 60% B for 0.5 min, changing to 0% B in 0.5 min, and holding at 0%  
509 for 1 min. The mass data were collected on a Waters SQD2 detector with an m/z range of  
510 2–3071.98 at a range of 1000–2000 m/z. The mass data were collected on a Waters SQD2 detector  
511 with an m/z range of 2–3071.98 at a range of 900–1500 m/z for ERK2 and 1000–2000 m/z for  
512 M<sup>pro</sup>. The desolvation temperature was 500 °C with a flow rate of 1000 L/h. The voltages used  
513 were 0.69 kV for the capillary and 46 V for the cone. Raw data were processed using openLYNX  
514 and deconvoluted using MaxEnt (20 - 60 kDa window, 1 Da/channel resolution).

515

516 *Kinase activity assays*

517 Biochemical Kinase inhibition assays were carried out at Nanosyn, Santa Clara. Test  
518 compounds were diluted in 100% DMSO using 3-fold dilution steps. Final compound  
519 concentration in assay ranged from 10 µM to 0.0565 nM. Compounds were tested in a single well  
520 for each dilution, and the final concentration of DMSO in all assays was kept at 1%. Reference

521 compound, Staurosporine, was tested in an identical manner. Compounds were preincubated in  
522 25C for 2 hours before the measurements, and the kinase reactions were then performed for an  
523 additional 3 hours. For ERK2, the kinase concentration was 0.25-0.35 nM, the ATP concentration  
524 was 25  $\mu$ M. For MELK, the kinase concentration was 0.06 nM, the ATP concentration was 30  
525  $\mu$ M. For VEGFR2, the kinase concentration was 0.25 nM, the ATP concentration was 80  $\mu$ M. For  
526 GSK3B, the kinase concentration was 0.09 nM, the ATP concentration was 10  $\mu$ M. For FGFR4,  
527 the kinase concentration was 0.17 nM, the ATP concentration was 250  $\mu$ M.

528

#### 529 *Biochemical M<sup>pro</sup> inhibition assay*

530 Compounds were seeded into assay-ready plates (Greiner 384 low volume 784900) using  
531 an Echo 555 acoustic dispenser, and DMSO was back-filled for a uniform concentration in assay  
532 plates (maximum 1%). Reagents for M<sup>pro</sup> assay were dispensed into the assay plate in 10  $\mu$ l  
533 volumes for a final of 20  $\mu$ l. Final reaction concentrations were 20 mM HEPES pH=7.3, 1mM  
534 TCEP, 50 mM NaCl, 0.01% Tween-20, 10% glycerol, 5 nM M<sup>pro</sup>, 375 nM fluorogenic peptide  
535 substrate ([5-FAM]-AVLQSGFR-[Lys(Dabcyl)]-K-amide). M<sup>pro</sup> was pre-incubated for 15  
536 minutes at room temperature with compound before addition of substrate. Protease reaction was  
537 measured continuously in a BMG Pherastar FS with a 480/520 ex/em filter set. Data was mapped  
538 and normalized in Genedata Screener.

539

#### 540 *M<sup>pro</sup>*

#### *Crystallography*

541 M<sup>pro</sup> protein was expressed and purified as discussed previously<sup>47</sup>. Apo M<sup>pro</sup> crystals were  
542 grown using the sitting drop vapour diffusion method at 20 °C by adding 150 nl of protein (5  
543 mg/ml in 20 mM Hepes pH 7.5, 50 mM NaCl) to 300 nl of crystallisation solution (11% PEG 4K,  
544 6% DMSO, 0.1M MES pH 6.7) and 50 nl of seed stock prepared from initial crystal hits. 55 nl of  
545 a 100 mM compound stock solution in DMSO was added directly to the crystallisation drops using  
546 an ECHO liquid handler (final concentration 10% DMSO) and drops were incubated for  
547 approximately 1 hour prior to mounting and flash freezing in liquid nitrogen. Data were collected  
548 at Diamond Light Source on beamline I04-1 at 100K and processed using XDS<sup>68</sup> and either xia2<sup>69</sup>,  
549 autoPROC<sup>70</sup> or DIALS<sup>71</sup>. Further analysis was performed with XChemExplorer<sup>72</sup>: electron  
550 density maps were generated with Dimple<sup>73</sup>; ligand-binding events were identified using  
551 PanDDA<sup>74</sup> (both the released version 0.2 and the pre-release development version  
552 (<https://github.com/ConorFWild/pandda>)); ligands were modelled into PanDDA-calculated event  
553 maps using Coot<sup>75</sup>; restraints were calculated with GRADE<sup>76</sup>; and structures were refined with  
554 BUSTER<sup>77</sup>. Coordinates, structure factors and PanDDA event maps for all data sets are deposited  
555 in the Protein Data Bank under PDB IDs 5RGT, 5RH5, 5RH6, 5RH7, 5RH9, 5RL0, 5RL1, 5RL2,  
556 5RL3, 5RL4 and 5RL5. Data collection and refinement statistics are summarised in Supplementary  
557 Table 2. The ground-state structure and all corresponding datasets are deposited under PDB ID  
558 5R8T.

559

560

561 **References**

- 562 1. Burger, J. A. & Buggy, J. J. Bruton tyrosine kinase inhibitor ibrutinib (PCI-32765).  
563 *Leukemia & Lymphoma* vol. 54 2385–2391 (2013).
- 564 2. Sequist, L. V. *et al.* Phase III study of afatinib or cisplatin plus pemetrexed in patients with  
565 metastatic lung adenocarcinoma with EGFR mutations. *J. Clin. Oncol.* **31**, 3327–3334  
566 (2013).
- 567 3. Oxnard, G. R. *et al.* Association Between Plasma Genotyping and Outcomes of Treatment  
568 With Osimertinib (AZD9291) in Advanced Non-Small-Cell Lung Cancer. *J. Clin. Oncol.*  
569 **34**, 3375–3382 (2016).
- 570 4. Bradshaw, J. M. *et al.* Prolonged and tunable residence time using reversible covalent  
571 kinase inhibitors. *Nat. Chem. Biol.* **11**, 525–531 (2015).
- 572 5. Lonsdale, R. & Ward, R. A. Structure-based design of targeted covalent inhibitors. *Chem.*  
573 *Soc. Rev.* **47**, 3816–3830 (2018).
- 574 6. Michalczyk, A. *et al.* Structural insights into how irreversible inhibitors can overcome drug  
575 resistance in EGFR. *Bioorg. Med. Chem.* **16**, 3482–3488 (2008).
- 576 7. Yun, C.-H. *et al.* The T790M mutation in EGFR kinase causes drug resistance by increasing  
577 the affinity for ATP. *Proc. Natl. Acad. Sci. U. S. A.* **105**, 2070–2075 (2008).
- 578 8. Ghosh, A. K., Samanta, I., Mondal, A. & Liu, W. R. Covalent Inhibition in Drug Discovery.  
579 *ChemMedChem* **14**, 889–906 (2019).
- 580 9. Cohen, M. S., Zhang, C., Shokat, K. M. & Taunton, J. Structural bioinformatics-based  
581 design of selective, irreversible kinase inhibitors. *Science* **308**, 1318–1321 (2005).
- 582 10. Nnadi, C. I. *et al.* Novel K-Ras G12C Switch-II Covalent Binders Destabilize Ras and  
583 Accelerate Nucleotide Exchange. *J. Chem. Inf. Model.* **58**, 464–471 (2018).
- 584 11. Zeng, M. *et al.* Potent and Selective Covalent Quinazoline Inhibitors of KRAS G12C. *Cell*  
585 *Chem Biol* **24**, 1005–1016.e3 (2017).
- 586 12. Canon, J. *et al.* The clinical KRAS(G12C) inhibitor AMG 510 drives anti-tumour  
587 immunity. *Nature* **575**, 217–223 (2019).
- 588 13. Vazquez-Rodriguez, S. & Wright, M. Design, Synthesis and Characterization of Covalent  
589 KDM5 Inhibitors. *Angewandte* (2019).
- 590 14. Dubiella, C., Baur, R., Cui, H., Huber, E. M. & Groll, M. Selective Inhibition of the  
591 Immunoproteasome by Structure-Based Targeting of a Non-catalytic Cysteine. *Angew.*  
592 *Chem. Int. Ed.* **54**, 15888–15891 (2015).
- 593 15. Angst, D. *et al.* Discovery of LOU064 (Remibrutinib), a Potent and Highly Selective  
594 Covalent Inhibitor of Bruton’s Tyrosine Kinase. *J. Med. Chem.* **63**, 5102–5118 (2020).
- 595 16. Weisner, J. *et al.* Covalent-allosteric kinase inhibitors. *Angew. Chem. Int. Ed.* **54**, 10313–  
596 10316 (2015).
- 597 17. Hagel, M. *et al.* First Selective Small Molecule Inhibitor of FGFR4 for the Treatment of  
598 Hepatocellular Carcinomas with an Activated FGFR4 Signaling Pathway. *Cancer Discov.*  
599 **5**, 424–437 (2015).
- 600 18. Ward, R. A. *et al.* Structure-Guided Design of Highly Selective and Potent Covalent  
601 Inhibitors of ERK1/2. *J. Med. Chem.* **58**, 4790–4801 (2015).
- 602 19. Backus, K. M. *et al.* Proteome-wide covalent ligand discovery in native biological systems.  
603 *Nature* **534**, 570–574 (2016).
- 604 20. Resnick, E. *et al.* Rapid Covalent-Probe Discovery by Electrophile-Fragment Screening. *J.*  
605 *Am. Chem. Soc.* **141**, 8951–8968 (2019).

- 606 21. Johansson, H. *et al.* Fragment-Based Covalent Ligand Screening Enables Rapid Discovery  
607 of Inhibitors for the RBR E3 Ubiquitin Ligase HOIP. *J. Am. Chem. Soc.* **141**, 2703–2712  
608 (2019).
- 609 22. Kathman, S. G., Xu, Z. & Statsyuk, A. V. A fragment-based method to discover irreversible  
610 covalent inhibitors of cysteine proteases. *J. Med. Chem.* **57**, 4969–4974 (2014).
- 611 23. Kathman, S. G. *et al.* A Small Molecule That Switches a Ubiquitin Ligase From a  
612 Processive to a Distributive Enzymatic Mechanism. *J. Am. Chem. Soc.* **137**, 12442–12445  
613 (2015).
- 614 24. Craven, G. B. *et al.* High-Throughput Kinetic Analysis for Target-Directed Covalent  
615 Ligand Discovery. *Angew. Chem. Int. Ed Engl.* **57**, 5257–5261 (2018).
- 616 25. Parker, C. G. *et al.* Ligand and Target Discovery by Fragment-Based Screening in Human  
617 Cells. *Cell* **168**, 527–541.e29 (2017).
- 618 26. London, N. *et al.* Covalent docking of large libraries for the discovery of chemical probes.  
619 *Nat. Chem. Biol.* **10**, 1066–1072 (2014).
- 620 27. Shraga, A. *et al.* Covalent Docking Identifies a Potent and Selective MKK7 Inhibitor. *Cell*  
621 *Chem Biol* **26**, 98–108.e5 (2019).
- 622 28. Toledo Warshaviak, D., Golan, G., Borrelli, K. W., Zhu, K. & Kalid, O. Structure-based  
623 virtual screening approach for discovery of covalently bound ligands. *J. Chem. Inf. Model.*  
624 **54**, 1941–1950 (2014).
- 625 29. Rachman, M. *et al.* DUckCov: a Dynamic Undocking-Based Virtual Screening Protocol for  
626 Covalent Binders. *ChemMedChem* **14**, 1011–1021 (2019).
- 627 30. Scarpino, A., Ferenczy, G. G. & Keserü, G. M. Comparative Evaluation of Covalent  
628 Docking Tools. *Journal of Chemical Information and Modeling* vol. 58 1441–1458 (2018).
- 629 31. Bensinger, D. *et al.* Virtual Screening Identifies Irreversible FMS-like Tyrosine Kinase 3  
630 Inhibitors with Activity toward Resistance-Conferring Mutations. *J. Med. Chem.* **62**, 2428–  
631 2446 (2019).
- 632 32. Chowdhury, S. R. *et al.* Discovery of covalent enzyme inhibitors using virtual docking of  
633 covalent fragments. *Bioorg. Med. Chem. Lett.* **29**, 36–39 (2019).
- 634 33. Hoffer, L. *et al.* CovaDOTS: In Silico Chemistry-Driven Tool to Design Covalent Inhibitors  
635 Using a Linking Strategy. *J. Chem. Inf. Model.* **59**, 1472–1485 (2019).
- 636 34. Wei, L. *et al.* Cov\_FB3D: A De Novo Covalent Drug Design Protocol Integrating the BA-  
637 SAMP Strategy and Machine-Learning-Based Synthetic Tractability Evaluation. *J. Chem.*  
638 *Inf. Model.* (2020) doi:10.1021/acs.jcim.9b01197.
- 639 35. Zhu, N. *et al.* A Novel Coronavirus from Patients with Pneumonia in China, 2019. *N. Engl.*  
640 *J. Med.* **382**, 727–733 (2020).
- 641 36. Wu, F. *et al.* A new coronavirus associated with human respiratory disease in China. *Nature*  
642 **579**, 265–269 (2020).
- 643 37. Jacobs, J. *et al.* Discovery, Synthesis, And Structure-Based Optimization of a Series ofN-  
644 (tert-Butyl)-2-(N-arylamido)-2-(pyridin-3-yl) Acetamides (ML188) as Potent Noncovalent  
645 Small Molecule Inhibitors of the Severe Acute Respiratory Syndrome Coronavirus (SARS-  
646 CoV) 3CL Protease. *Journal of Medicinal Chemistry* vol. 56 534–546 (2013).
- 647 38. Lewell, X. Q., Judd, D. B., Watson, S. P. & Hann, M. M. RECAP--retrosynthetic  
648 combinatorial analysis procedure: a powerful new technique for identifying privileged  
649 molecular fragments with useful applications in combinatorial chemistry. *J. Chem. Inf.*  
650 *Comput. Sci.* **38**, 511–522 (1998).
- 651 39. Bemis, G. W. & Murcko, M. A. The properties of known drugs. 1. Molecular frameworks.

- 652 *J. Med. Chem.* **39**, 2887–2893 (1996).
- 653 40. Shi, L., Zhong, Z., Li, X., Zhou, Y. & Pan, Z. Discovery of an Orally Available Janus  
654 Kinase 3 Selective Covalent Inhibitor. *J. Med. Chem.* **62**, 1054–1066 (2019).
- 655 41. Caldwell, R. D. *et al.* Discovery of Evobrutinib: An Oral, Potent, and Highly Selective,  
656 Covalent Bruton's Tyrosine Kinase (BTK) Inhibitor for the Treatment of Immunological  
657 Diseases. *J. Med. Chem.* **62**, 7643–7655 (2019).
- 658 42. Liang, X. *et al.* Discovery of 2-((3-Acrylamido-4-methylphenyl)amino)-N-(2-methyl-5-  
659 (3,4,5-trimethoxybenzamido)phenyl)-4-(methylamino)pyrimidine-5-carboxamide  
660 (CHMFL-BMX-078) as a Highly Potent and Selective Type II Irreversible Bone Marrow  
661 Kinase in the X Chromosome (BMX) Kinase Inhibitor. *J. Med. Chem.* **60**, 1793–1816  
662 (2017).
- 663 43. Engel, J. *et al.* Targeting Drug Resistance in EGFR with Covalent Inhibitors: A Structure-  
664 Based Design Approach. *J. Med. Chem.* **58**, 6844–6863 (2015).
- 665 44. Jin, Z. *et al.* Structure of Mpro from COVID-19 virus and discovery of its inhibitors.  
666 *bioRxiv* (2020).
- 667 45. Jacobs, J. *et al.* Discovery, synthesis, and structure-based optimization of a series of N-(tert-  
668 butyl)-2-(N-arylamido)-2-(pyridin-3-yl) acetamides (ML188) as potent noncovalent small  
669 molecule inhibitors of the severe acute respiratory syndrome coronavirus (SARS-CoV) 3CL  
670 protease. *J. Med. Chem.* **56**, 534–546 (2013).
- 671 46. Zhang, L. *et al.* Crystal structure of SARS-CoV-2 main protease provides a basis for design  
672 of improved  $\alpha$ -ketoamide inhibitors. *Science* (2020) doi:10.1126/science.abb3405.
- 673 47. Douangamath, A. *et al.* Crystallographic and electrophilic fragment screening of the SARS-  
674 CoV-2 main protease. *bioRxiv* 2020.05.27.118117 (2020) doi:10.1101/2020.05.27.118117.
- 675 48. Hoffer, L. *et al.* Integrated Strategy for Lead Optimization Based on Fragment Growing:  
676 The Diversity-Oriented-Target-Focused-Synthesis Approach. *J. Med. Chem.* **61**, 5719–5732  
677 (2018).
- 678 49. Delépine, B., Duigou, T., Carbonell, P. & Faulon, J.-L. RetroPath2.0: A retrosynthesis  
679 workflow for metabolic engineers. *Metab. Eng.* **45**, 158–170 (2018).
- 680 50. Law, J. *et al.* Route Designer: a retrosynthetic analysis tool utilizing automated  
681 retrosynthetic rule generation. *J. Chem. Inf. Model.* **49**, 593–602 (2009).
- 682 51. Watson, I. A., Wang, J. & Nicolaou, C. A. A retrosynthetic analysis algorithm  
683 implementation. *J. Cheminform.* **11**, 1 (2019).
- 684 52. Ertl, P. & Schuffenhauer, A. Estimation of synthetic accessibility score of drug-like  
685 molecules based on molecular complexity and fragment contributions. *J. Cheminform.* **1**, 8  
686 (2009).
- 687 53. Huang, Q., Li, L.-L. & Yang, S.-Y. RASA: a rapid retrosynthesis-based scoring method for  
688 the assessment of synthetic accessibility of drug-like molecules. *J. Chem. Inf. Model.* **51**,  
689 2768–2777 (2011).
- 690 54. Podolyan, Y., Walters, M. A. & Karypis, G. Assessing synthetic accessibility of chemical  
691 compounds using machine learning methods. *J. Chem. Inf. Model.* **50**, 979–991 (2010).
- 692 55. Chaikuad, A. *et al.* A unique inhibitor binding site in ERK1/2 is associated with slow  
693 binding kinetics. *Nat. Chem. Biol.* **10**, 853–860 (2014).
- 694 56. Flanagan, M. E. *et al.* Chemical and computational methods for the characterization of  
695 covalent reactive groups for the prospective design of irreversible inhibitors. *J. Med. Chem.*  
696 **57**, 10072–10079 (2014).
- 697 57. Palazzesi, F. *et al.* BInactive: A Machine-Learning Model to Estimate Covalent Warhead

- 698            Reactivity. *J. Chem. Inf. Model.* **60**, 2915–2923 (2020).
- 699    58. Palazzesi, F., Grundl, M. A., Pautsch, A., Weber, A. & Tautermann, C. S. A Fast Ab Initio  
700    Predictor Tool for Covalent Reactivity Estimation of Acrylamides. *J. Chem. Inf. Model.*  
701    (2019) doi:10.1021/acs.jcim.9b00316.
- 702    59. Lonsdale, R. *et al.* Expanding the Armory: Predicting and Tuning Covalent Warhead  
703    Reactivity. *J. Chem. Inf. Model.* **57**, 3124–3137 (2017).
- 704    60. Bandyopadhyay, A. & Gao, J. Targeting biomolecules with reversible covalent chemistry.  
705    *Curr. Opin. Chem. Biol.* **34**, 110–116 (2016).
- 706    61. Shindo, N. *et al.* Selective and reversible modification of kinase cysteines with  
707    chlorofluoroacetamides. *Nat. Chem. Biol.* **15**, 250–258 (2019).
- 708    62. Backus, K. M. Applications of Reactive Cysteine Profiling. *Curr. Top. Microbiol. Immunol.*  
709    **420**, 375–417 (2019).
- 710    63. Martín-Gago, P. & Olsen, C. A. Arylfluorosulfate-Based Electrophiles for Covalent Protein  
711    Labeling: A New Addition to the Arsenal. *Angew. Chem. Int. Ed.* **58**, 957–966 (2019).
- 712    64. Shannon, D. A. & Weerapana, E. Covalent protein modification: the current landscape of  
713    residue-specific electrophiles. *Curr. Opin. Chem. Biol.* **24**, 18–26 (2015).
- 714    65. Ray, S. & Murkin, A. S. New Electrophiles and Strategies for Mechanism-Based and  
715    Targeted Covalent Inhibitor Design. *Biochemistry* (2019)  
716    doi:10.1021/acs.biochem.9b00293.
- 717    66. Kuhlman, B. & Baker, D. Native protein sequences are close to optimal for their structures.  
718    *Proc. Natl. Acad. Sci. U. S. A.* **97**, 10383–10388 (2000).
- 719    67. Chodera, J., Lee, A. A., London, N. & von Delft, F. Crowdsourcing drug discovery for  
720    pandemics. *Nat. Chem.* **12**, 581 (2020).
- 721    68. Kabsch, W. Integration, scaling, space-group assignment and post-refinement. *Acta*  
722    *Crystallographica Section D Biological Crystallography* vol. 66 133–144 (2010).
- 723    69. Winter, G., Lobley, C. M. C. & Prince, S. M. Decision making in xia2. *Acta Crystallogr. D*  
724    *Biol. Crystallogr.* **69**, 1260–1273 (2013).
- 725    70. Vonrhein, C. *et al.* Data processing and analysis with the autoPROC toolbox. *Acta*  
726    *Crystallogr. D Biol. Crystallogr.* **67**, 293–302 (2011).
- 727    71. Winter, G. *et al.* DIALS: implementation and evaluation of a new integration package. *Acta*  
728    *Crystallogr D Struct Biol* **74**, 85–97 (2018).
- 729    72. Krojer, T. *et al.* The XChemExplorer graphical workflow tool for routine or large-scale  
730    protein–ligand structure determination. *Acta Crystallographica Section D: Structural*  
731    *Biology* **73**, 267–278 (2017).
- 732    73. Keegan, R., Wojdyr, M., Winter, G. & Ashton, A. DIMPLE: a difference map pipeline for  
733    the rapid screening of crystals on the beamline. in *Acta Crystallographica a-Foundation*  
734    *and Advances* vol. 71 S18–S18 (INT UNION CRYSTALLOGRAPHY 2 ABBEY SQ,  
735    CHESTER, CH1 2HU, ENGLAND, 2015).
- 736    74. Pearce, N. M. *et al.* A multi-crystal method for extracting obscured crystallographic states  
737    from conventionally uninterpretable electron density. *Nat. Commun.* **8**, 15123 (2017).
- 738    75. Emsley, P., Lohkamp, B., Scott, W. G. & Cowtan, K. Features and development of Coot.  
739    *Acta Crystallogr. D Biol. Crystallogr.* **66**, 486–501 (2010).
- 740    76. Long, F. *et al.* AceDRG: a stereochemical description generator for ligands. *Acta*  
741    *Crystallogr D Struct Biol* **73**, 112–122 (2017).
- 742    77. Bricogne, G. *et al.* BUSTER version 2.10. 0. Cambridge, United Kingdom: Global Phasing  
743    Ltd (2011).

## 745 **Acknowledgments**

746 We thank Prof. Oded Livnah for generously providing us recombinant ERK2. N.L. is the  
747 incumbent of the Alan and Laraine Fischer Career Development Chair. N.L. would like to  
748 acknowledge funding from the Israel Science Foundation (grants no. 2462/19 and 3824/19), The  
749 Israel Cancer Research Fund, the Israeli Ministry of Science Technology (grant no. 3-14763), the  
750 Moross Integrated Cancer Center and the Barry Sherman institute for Medicinal Chemistry. This  
751 research was supported by Nelson P. Sirotsky. N.L. is also supported by the Helen and Martin  
752 Kimmel Center for Molecular Design, Joel and Mady Dukler Fund for Cancer Research, the Estate  
753 of Emile Mimran and Virgin JustGiving, and the George Schwartzman Fund. D.Z. was funded in  
754 part by the pearlman student-initiated research award. The SGC is a registered charity (number  
755 1097737) that receives funds from AbbVie, Bayer Pharma AG, Boehringer Ingelheim, Canada  
756 Foundation for Innovation, Eshelman Institute for Innovation, Genome Canada, Innovative  
757 Medicines Initiative (EU/EFPIA) [ULTRA-DD grant no. 115766], Janssen, Merck KGaA  
758 Darmstadt Germany, MSD, Novartis Pharma AG, Ontario Ministry of Economic Development  
759 and Innovation, Pfizer, São Paulo Research Foundation-FAPESP, Takeda, and Wellcome  
760 [106169/ZZ14/Z].
